1     Capillary Morphogenesis gene 2 mediates multiple pathways of growth factor-induced  
2                                    angiogenesis by regulating endothelial cell chemotaxis

3                   Lorna Cryan<sup>b,‡</sup>, Tsz-Ming Tsang<sup>a,‡</sup>, Jessica Stiles<sup>b</sup>, Lauren Bazinet<sup>b</sup>, Sai Lun Lee<sup>a</sup>,  
4                   Samuel Garrard<sup>a</sup>, Cody Roberts<sup>a</sup>, Jessie Payne<sup>a</sup>, P. Christine Ackroyd<sup>a</sup>, Kenneth A.  
5                                    Christensen<sup>a</sup>, Michael S. Rogers<sup>b</sup>

6     <sup>a</sup>Department of Chemistry and Biochemistry, Brigham Young University, Provo, Utah, United States of  
7     America 84602. T. Tsang, [jeremytmsang@outlook.com](mailto:jeremytmsang@outlook.com); S.L. Lee, [leesailun91@gmail.com](mailto:leesailun91@gmail.com); S. Garrard,  
8     [sam.garrard@byu.edu](mailto:sam.garrard@byu.edu); C. Roberts, [cdejames3@gmail.com](mailto:cdejames3@gmail.com); P.C. Ackroyd, [ackroyd@byu.edu](mailto:ackroyd@byu.edu)

9  
10    <sup>b</sup>Department of Surgery, Vascular Biology Program, Children's Hospital Boston, Harvard Medical School,  
11    Boston, Massachusetts, United States of America 02115. Email: M.S. Rogers,  
12                                    [Michael.rogers@childrens.harvard.edu](mailto:Michael.rogers@childrens.harvard.edu)

13

14

## 15 **Abstract**

16 Pathological angiogenesis contributes to diseases as varied as cancer and corneal  
17 neovascularization. The vascular endothelial growth factor (VEGF) - VEGF receptor 2  
18 (KDR/VEGFR2) axis has been the major target for treating pathological angiogenesis. However,  
19 VEGF-targeted therapies exhibit reduced efficacy over time, indicating that new therapeutic  
20 strategies are needed. Therefore, identifying new targets that mediate angiogenesis is of great  
21 importance. Here, we report that one of the anthrax toxin receptors, capillary morphogenesis  
22 gene 2 (ANTXR2/CMG2), plays an important role in mediating angiogenesis induced by both  
23 bFGF and VEGF. Inhibiting physiological ligand binding to CMG2 results in significant reduction  
24 of corneal neovascularization, endothelial tube formation and cell migration. We also report the  
25 novel finding that CMG2 mediates angiogenesis by regulating the direction of endothelial  
26 chemotactic migration without affecting overall cell motility.

## 27 **Introduction**

28 Pathological angiogenesis plays a role in many diseases, including cancers and various  
29 ocular diseases that lead to blindness. Most of the current treatment strategies are targeting the  
30 VEGF - VEGFR2 axis. However, such therapies only provide modest efficacy overtime and are  
31 accompanied unpleasant side effects. Thus, identification of new anti-angiogenic targets are  
32 needed and critical for development of alternative therapeutic strategies. It was previously  
33 demonstrated that one of the anthrax toxin receptors, CMG2, has a role in mediating  
34 angiogenesis<sup>1, 2</sup>. Our previous work demonstrated that inhibition of CMG2 potently reduces  
35 angiogenesis in the cornea<sup>1</sup> and inhibit endothelial cell migration<sup>3, 4</sup>. Thus, we are interested to  
36 investigate the role(s) of CMG2 in mediating angiogenesis.

37 While knowledge of CMG2's exact role in angiogenesis remains limited, CMG2's  
38 function as one of anthrax toxin receptors is very well established. CMG2 and its homolog,

39 tumor endothelial marker 8 (ANTXR1 / TEM8), are the primary sites of anthrax toxin entry into  
40 the cells. CMG2 and TEM8 share 40% amino acid homology, including homology in an  
41 intracellular domain of unknown function that is shared with no other protein in the mammalian  
42 genome<sup>5</sup>. Within their cell-surface von Willebrand Factor A (VWA) ligand-binding domains,  
43 homology between CMG2 and TEM8 rises to 60%<sup>6</sup>. During anthrax intoxication, the 83kDa  
44 protective antigen (PA), one of three protein subunits from *Bacillus anthracis*, binds to the VWA  
45 ligand binding domain of the receptor. PA is then cleaved by a furin-like protease that cuts and  
46 releases a 20kDa fragment, leaving a 63kDa PA at the receptor surface. The cleaved PA  
47 oligomerizes to form a PA-receptor heptamer, which acts as a binding platform for the other two  
48 toxin subunits, lethal factor (LF) and edema factor (EF), Together, these toxin subunits form the  
49 complete anthrax toxin, which is then trafficked into the cell with via clathrin-mediated  
50 endocytosis<sup>7</sup>.

51 The endogenous functions of the anthrax toxin receptors in the absence of anthrax toxin  
52 are still poorly understood, although, it has been suggested that these receptors interact with  
53 extra-cellular matrix (ECM) proteins<sup>2, 8</sup>. In particular, a series of studies have observed  
54 observed that mutations on CMG2 or TEM8 ead to build-up of hyaline materials that result in  
55 alteration of of skeletal growth and/or alternation of vascular patterns. For example, Loss-of-  
56 function mutations in TEM8 cause GAPO syndrome, a disease characterized by vascular  
57 anomalies, skeletal defects, growth retardation and progressive fibrosis of various organs<sup>9, 10</sup>.  
58 Mutations in CMG2 in humans cause Hyaline Fibromatosis Syndrome (HFS), a rare but serious  
59 autosomal recessive disorder that is characterized by accumulation of hyaline material in  
60 connective tissue in the skin and other organs and by the presence of non-cancerous nodules<sup>11-</sup>  
61 <sup>13</sup> containing excess collagen I, collagen VI, and glycosaminoglycans. To explain the symptoms  
62 of HFS, it has been hypothesized that patients with a CMG2 mutation have a defect in either the  
63 synthesis or degradation of ECM<sup>12, 14</sup>, presumably related to CMG2 dysfunction.

64 In addition to ECM binding and trafficking anthrax toxins, it has been suggested that  
65 ANTXRs have angiogenic related functions<sup>1, 15</sup>. Our previous work demonstrated that a furin-  
66 cleavage-site mutant of protective antigen (PA<sup>SSSR</sup>) inhibits basic fibroblast growth factor  
67 (bFGF)-induced corneal neovascularization, VEGF-induced corneal neovascularization, and  
68 tumor growth<sup>1,16</sup>. However, because PA<sup>SSSR</sup> is known to bind both anthrax toxin receptors  
69 (CMG2 and TEM8) as well as integrin  $\beta 1$ <sup>17, 18</sup>, which of these receptors was responsible for  
70 mediating the observed anti-angiogenic effect of PA<sup>SSSR</sup> *in vivo* was not firmly established.  
71 CMG2 has a much higher affinity for PA than the other two receptors<sup>18-20</sup> and has been  
72 considered the major receptor for PA<sup>21</sup>. Thus, we hypothesized that CMG2 was the likely  
73 receptor responsible for the anti-angiogenic effects of PA<sup>SSSR</sup>. Work described here outlines  
74 experiments that firmly establish CMG2 as the receptor mediating the observed anti-angiogenic  
75 impact of PA<sup>SSSR</sup>, and provide insight into the role of CMG2 in mediating angiogenesis in  
76 endothelial cells.

## 77 **Result and Discussion**

### 78 *Comparison of roles for CMG2 and TEM8 in corneal angiogenesis.*

79 As mentioned previously, PA<sup>SSSR</sup> administration inhibits angiogenesis as measured by  
80 endothelial cell migration, corneal neovascularization, and tumor growth<sup>1, 16</sup>. PA<sup>SSSR</sup> is known to  
81 interact with both anthrax toxin receptors and integrin  $\beta 1$ <sup>17, 18</sup>. Hence, each of these interactions  
82 could, in theory, be responsible for the observed anti-angiogenic effects *in vivo*. CMG2 and  
83 TEM8 bind PA<sup>SSSR</sup> much more tightly than does integrin  $\beta 1$  (CMG2  $K_d = 200\text{pM}$ ; TEM8  $K_d =$   
84  $100\text{nM}$ <sup>18, 22</sup>; integrin  $\beta 1$   $K_d = 1\mu\text{M}$ ), and are therefore more likely to mediate the antiangiogenic  
85 effects of PA<sup>SSSR</sup> than is integrin  $\beta 1$ . We performed a series of experiments to compare the  
86 relative contributions of CMG2 and TEM8 to corneal neovascularization in mice, and to  
87 determine whether blockade of either of these receptors was sufficient to explain the observed

88 anti-angiogenic effects of PA<sup>SSR</sup>. First, we carried out experiments that used either a CMG2 or  
89 TEM8 extracellular domain fused to an antibody Fc-domain to disrupt the ligand-receptor  
90 interaction by competing for binding of endogenous ligand. In the corneal micropocket assay,  
91 administration of CMG2-Fc significantly inhibited bFGF-induced vessel growth when compared  
92 to the untreated control, but the TEM8-Fc fusion did not (Fig. 1A). Hence, targeting CMG2  
93 impacted corneal angiogenesis, while targeting TEM8 did not. We confirmed this observation by  
94 administering antibodies specific to either the CMG2 or TEM8 extracellular domains. The  
95 presence of the anti-CMG2 antibody significantly reduced bFGF-induced corneal  
96 neovascularization in a concentration-dependent manner (Fig. 1B). In contrast, treatment with  
97 the anti-TEM8 antibody L2 at a dose and schedule previously shown to inhibit tumor growth in  
98 mice (20 mg/kg/week)<sup>23</sup> resulted in no significant decrease in corneal neovascularization  
99 compared to the vehicle control (Fig. 1C). Together, these results show that inhibiting the  
100 interaction of CMG2 with its physiological ligand significantly inhibits corneal angiogenesis,  
101 while inhibition of the TEM8-ligand interaction does not.

102 To confirm the importance of CMG2 rather than TEM8 as a mediator of angiogenesis in  
103 the cornea, we next sought to identify phenotypic changes that result from CMG2 or TEM8  
104 knockout. We performed the corneal micropocket assay in both WT and CMG2 knockout (-/-),  
105 mice, using either bFGF or VEGF to induce vessel growth (Fig 1D-H). CMG2 knockout (CMG2-  
106 -/-) mice exhibit a striking reduction in both bFGF-induced (Fig 1E) and VEGF-induced (Fig 1F)  
107 corneal vascularization compared to WT mice. This result clearly indicates a role for CMG2 in  
108 corneal angiogenesis. Interestingly, female mice were particularly susceptible to this effect (Fig  
109 S1A-B), and exhibited a dramatic (>85%) reduction in their response to VEGF (Fig S1B). In  
110 contrast, TEM8 knockout (TEM8-/-) mice exhibited no significant reduction when stimulated with  
111 VEGF (Fig 1H) and only modest reductions in bFGF-induced neovascularization (15%; p<0.05),

112 (Fig 1G, S1C-D). These data confirm that CMG2 plays a quantitatively substantial role in  
113 corneal neovascularization, while TEM8 does not.

114 It remained possible that both anthrax toxin receptors might still be responsible for  
115 mediating the previously observed anti-angiogenic effects of PA<sup>SSSR</sup>. To assess this possibility,  
116 we evaluated the efficacy of PA<sup>SSSR</sup> in reducing corneal vascularization in CMG2<sup>-/-</sup> or TEM8<sup>-/-</sup>  
117 mice. Importantly, CMG2<sup>-/-</sup> mice did not show reduction in bFGF-induced corneal angiogenesis  
118 (Fig2A). In contrast, PA<sup>SSSR</sup> treatment significantly reduced corneal neovascularization in both  
119 wild-type control animals and TEM8<sup>-/-</sup> mice (Fig 2B). We conclude that CMG2 blockade is  
120 responsible for the anti-angiogenic effects of PA<sup>SSSR</sup>.

121 *Comparison of roles for CMG2 and TEM8 in endothelial tube formation, cell proliferation, and*  
122 *cell migration.*

123 To establish whether the effect of CMG2 knockout or blockade is intrinsic to endothelial  
124 cells, we performed tube formation assays in Matrigel with HMVEC cells, which express both  
125 CMG2 and TEM8. We note that due to culture limitations, both CMG2 and TEM8 ablation in  
126 HMVEC using CRISPR is not possible. However, knockdown using siRNA was successful. We  
127 compared the anti-angiogenic effects of PA<sup>SSSR</sup> on cells selectively expressing only one of the  
128 two receptors (Fig 2C). In TEM8 knockdown (KD) cells (which primarily express CMG2), PA<sup>SSSR</sup>  
129 administration resulted in a concentration-dependent reduction in the extent of tube network  
130 formation (Fig 2D-E). In contrast, tube formation in CMG2 KD cells was not altered by PA  
131 treatment (Fig 2D-E). Together with knockout data described above, these results demonstrate  
132 that PA<sup>SSSR</sup> retains its anti-angiogenic effect in both TEM8<sup>-/-</sup> mice and TEM8 KD HMVECs but  
133 not in CMG2<sup>-/-</sup> mice or CMG2 KD cells. Hence, we conclude that PA<sup>SSSR</sup> exerts its anti-  
134 angiogenic effects on endothelial cells via CMG2.

135

136 We next worked to determine the CMG2-mediated endothelial process that PA<sup>SSSR</sup>  
137 disrupts to decrease angiogenesis. During angiogenesis, endothelial tip cells receive migratory  
138 signals and orient themselves to migrate up a chemotactic gradient, while stalk cells follow and  
139 then proliferate to form new vessel(s).<sup>24</sup> Thus, CMG2 could regulate angiogenesis by impacting  
140 cell proliferation and/or cell migration. We have previously demonstrated that PA<sup>SSSR</sup> affects cell  
141 migration, but not proliferation in HMVEC<sup>1</sup>, a primary endothelial cell type. Consistent with this  
142 result, CMG2 knockdown did not significantly reduce HMVEC proliferation (Fig S2A-D). Similar  
143 results are obtained for TEM8 knockdown. We also observe no reduction in cell proliferation in  
144 EA.hy926 endothelial cells (a fusion of human umbilical vein cells with lung carcinoma cells)  
145 treated with PA<sup>SSSR</sup> under conditions that selectively target CMG2 (Fig S4A). Together, these  
146 data suggest that CMG2 inhibition must impact angiogenesis by modulating endothelial cell  
147 migration, rather than cell proliferation.

#### 148 *Investigation of possible ECM ligands for CMG2.*

149 Our data support the idea that PA<sup>SSSR</sup> exerts its anti-angiogenic effects by competing  
150 with interaction(s) between the CMG2 von Willebrand Factor A (vWA)<sup>25, 26</sup> domain (including the  
151 metal ion-dependent adhesion site (MIDAS)<sup>5, 27</sup> and endogenous ligand(s). However, the  
152 specific ligands that regulate angiogenesis by binding CMG2 remain unidentified, although  
153 different possibilities have been proposed<sup>2, 8</sup>. ECM proteins are likely candidates because of  
154 CMG2's homology with integrins<sup>26</sup>, modest available data showing CMG2 interaction with ECM  
155 proteins<sup>2</sup>, and the observation that in individuals with hyaline fibromatosis syndrome (HFS),  
156 CMG2 mutations in the VWA domain result in widespread accumulation and of extracellular  
157 matrix (ECM) proteins<sup>8</sup>. To verify interaction of CMG2 with ECM proteins, we used ELISA to  
158 measure CMG2 K<sub>d</sub> for a series of different ECM proteins (Table S1; Fig S3 A-D). Interestingly,  
159 each of the ECM proteins tested (Collagens I, VI, laminin and fibronectin) interacted with CMG2  
160 with near-indistinguishable near-micromolar K<sub>d</sub> values (Table S1). Similar K<sub>d</sub> values for different

161 ECM proteins in these assays did not reflect artefacts in the binding assay, since both positive  
162 and negative control assays (CMG2 + PA<sup>SSSR</sup> and CMG2 + PA<sup>SSSR</sup> in the presence of EDTA,  
163 respectively) mirrored previously published  $K_d$  values<sup>18</sup>. Previously published data on CMG2–  
164 matrix interactions used single-concentration assessment to conclude that CMG2 may bind  
165 preferentially to collagens IV<sup>2</sup> or VI<sup>8</sup>, but did not measure relative CMG2 affinity for different  
166 ECM proteins. Differences in protein preparation, matrix adhesion to wells, number of binding  
167 sites per molecule, and incubation time are all factors which influence relative signal observed in  
168 blot- and ELISA-based assays, our binding curves are not necessarily at odds with previously  
169 reported results. Differences in protein preparation, matrix adhesion to wells, and number of  
170 binding sites per molecule are all factors which influence relative signal observed in blot- and  
171 ELISA-based assays, and our binding curves are not necessarily at odds with previously  
172 reported results<sup>2, 8</sup>. In addition, as a strategy to correct for possible differences in binding  
173 kinetics between ECM proteins, our ELISA data was quantified after fluorescence signal had  
174 largely stopped changing. Our initial time points showed much higher fluorescent signal for Col-  
175 VI than other ECM proteins, consistent with the single-concentration observations reported by  
176 the van der Goot lab<sup>8</sup>; however, the observed higher fluorescent signal was not indicative of  
177 higher affinity. Similar affinity of CMG2 for the matrix proteins tested, as shown in Table S1,  
178 indicates that CMG2 may bind to multiple ECM ligands and/or ECM peptide fragments. Such  
179 broad binding of ECM proteins also indicates that CMG2 could, like integrins, a significant role  
180 in cell adhesion and motility through direct interactions with the extracellular matrix.

### 181 *CMG2 and its role in cell adhesion and migration.*

182 To provide evidence for the assertion that CMG2 could play a role in cell adhesion, we  
183 performed *ex vivo* cell adhesion assays with EA.hy926 cells on plates coated with different  
184 ECMs (Collagens I, IV, and VI, Human Fibronectin, and Laminin-111). Treatment with PA<sup>SSSR</sup> at  
185 concentrations identical to the CMG2  $K_d$  value (200pM) significantly reduced EA.hy926 cell



186 adhesion on plates coated with each ECM, but not on uncoated plates (NT) (Fig S4B). We note  
187 that at this concentration CMG2, but not TEM8, is blocked by PA<sup>SSSR</sup>. Together, these data  
188 suggest that CMG2 plays a role in mediating cell adhesion to ECM proteins<sup>26</sup>, and that PA<sup>SSSR</sup>  
189 binding to CMG2 inhibits that interaction.

190 In angiogenesis a major function of cell adhesion is to enable cell migration. We  
191 hypothesize that CMG2 may play a role in enabling cell movement. In that case, PA<sup>SSSR</sup> would  
192 inhibit cell migration as well as adhesion. Indeed, we find that PA<sup>SSSR</sup> significantly reduces cell  
193 migration on multiple different ECM substrates (Fig S4C-D). Specifically, we used fetal bovine  
194 serum as chemoattractant in a microfluidic perfusion device which contains a perfusion chamber  
195 that allows formation of a small molecule- and macromolecule- concentration gradient. In this  
196 setup, we can observe migration of individual cells in real time. As expected, PA<sup>SSSR</sup> treatment  
197 resulted in decreased migration over nearly all ECM surfaces (Fig S4C-D), even at the 200pM  
198 concentration expected to result in only 50% bound CMG2. Combining these adhesion and  
199 migration data, we conclude that ECM proteins mediate endothelial cell adhesion and migration  
200 through interaction with CMG2, and that PA<sup>SSSR</sup> can disrupt this interaction (Fig S4B-D).

201 Notably, the nature of this migration assay allows us to compare two different aspects of  
202 migration: initiation of cell movement (chemokinesis) and directional motion towards growth  
203 factor-containing serum (chemotaxis). Surprisingly, targeting CMG2 in EA.hy926 cells with  
204 PA<sup>SSSR</sup> at the CMG2 Kd (200pM) showed a 70% decrease in observed chemotaxis on non-  
205 coated surface (70%, P<0.01; Fig S4C. Given that we expect only 50% CMG2 occupancy at  
206 these PA<sup>SSSR</sup> concentrations, this chemotactic inhibition is dramatic and surprising. In contrast,  
207 the total distance traveled by PA<sup>SSSR</sup> treated cells was only modestly (~20%) reduced, compared  
208 to untreated cells (Fig S4D). Thus, CMG2 targeting has a dramatic effect on chemotaxis but  
209 little effect on chemokinesis.

210 Further support for involvement of CMG2 in chemotaxis rather than chemokinesis is  
211 provided by transwell migration experiments performed on CMG2 knockdown HMVEC cells.  
212 Like many other traditional migration assays, the transwell assay does not provide a stable  
213 chemoattractant gradient to allow chemotaxis measurement<sup>28</sup>, and thus only measures  
214 chemokinesis. Evaluation of these CMG2 knockdown cells via transwell migration assays  
215 showed no significant difference between wild-type and CMG2 or TEM8 knockdown HMVEC  
216 (Fig S4E), consistent with our previous observation that CMG2 inhibition impacts chemotaxis  
217 but not chemokinesis.

218 We next examined the effect of CMG2 depletion on chemotactic migration in EA.hy926  
219 cells, using CRISPR to target Exon1. Loss of CMG2 function in knockout cells was validated  
220 with a flow cytometry assay in which uptake of a fluorescent PA-AF568 conjugate was  
221 evaluated at CMG2  $K_d$  200pM (Fig 3A). CMG2 knockout cells showed substantial inhibition of  
222 intracellular fluorescence relative to WT cells, and knockout cell fluorescence was  
223 indistinguishable from that of negative control WT cells (Fig 3A). The ability of transfected  
224 CMG2-mClover to rescue the PA uptake defect was confirmed, demonstrating that off-target  
225 effects cannot explain loss of PA uptake in these cells (Fig 3A). Importantly, evaluation of the  
226 migration of these EA.hy926 knockout cells in our microfluidic device demonstrated that while  
227 WT cells migrated toward serum (Fig 3B), CMG2<sup>-/-</sup> cells migrated only in a random manner (Fig  
228 3C). Significantly, knockout cells showed complete abolition of chemotactic migration (Fig 3E)  
229 but only slight alteration of chemokinetic migration ( $P < 0.001$ ) (Fig 3F).

230 To confirm that the loss of chemotaxis in CMG2 KO cells was not a consequence of off  
231 target CRISPR effects, we complemented the CMG2 mutation with a CMG2-clover expression  
232 vector and found that CMG2 add-back restored EA.hy926 cell chemotaxis (Fig 3D-E). Hence,  
233 CMG2 is a critical component of chemotactic sensing or response in these cells, and may play a  
234 role in regulating endothelial cell chemotaxis *in vivo*. Of interest, CMG2 is required for

235 reorientation of the mitotic spindle in zebrafish embryos<sup>29</sup> suggesting that it might also play a  
236 role in orienting the microtubule cytoskeleton in a chemotactic context.

237 *CMG2 impacts developmental angiogenesis.*

238 We next investigated the effect of CMG2 deletion on developmental angiogenesis. To do  
239 so, we compared retinal vessel development between WT and CMG2<sup>-/-</sup> mouse. We found that  
240 the total vascular area was similar between the two genotypes (Fig. 4). However, the vascular  
241 growth pattern observed was different between knockout and WT mice, with knockout mice  
242 having a more bush-like pattern versus the tree-like pattern observed in WT animals (Fig. 4A).  
243 Careful quantitation showed that the total number of veins in the retina of WT and CMG2<sup>-/-</sup> mice  
244 is similar (Fig 4A-B), but CMG2<sup>-/-</sup> mice have slightly fewer primary arteries (Fig 4A, C).  
245 Importantly, CMG2<sup>-/-</sup> mice showed 2.5-fold more primary branches per artery than the WT cells  
246 (Fig 4A, D). This difference in vessel patterning could be consistent with the loss of chemotactic  
247 migration observed in knockout cells. We speculate that in the absence of CMG2, endothelial  
248 cells effectively lose chemotactic signals (though haptotactic and other signals may be  
249 retained), which reduces effective directional movement. This (hypothesized) weaker response  
250 in CMG2<sup>-/-</sup> mice to a developmental angiogenic gradient would leave some areas of the retina  
251 with poor perfusion. Angiogenic signals from these areas could then lead to additional branching  
252 to alleviate hypoxia, resulting in a vasculature that remains functional, but is patterned  
253 differently.

254 *CMG2-mediated chemotaxis is sensitive to multiple growth factors.*

255 We have demonstrated here that CMG2-deficient mice showed potent reduction in  
256 corneal neovascularization induced by both bFGF and VEGF. To more fully elucidate CMG2's  
257 angiogenic response to bFGF and VEGF, we carried out experiments that measured endothelial  
258 cell chemotactic migration in response to these two growth factor gradients respectively.

259 EA.hy926 cells display chemotactic migration towards FBS, bFGF and VEGF (Fig S5), and this  
260 migration is significantly inhibited with 200pM of PA<sup>SSR</sup> treatment (Fig 3F, S5). Cells treated  
261 with PA<sup>SSR</sup> showed significantly lower chemotaxis in FBS, bFGF, or VEGF gradient (Fig 3F,  
262 S5), further suggest that CMG2 plays a critical role in mediating chemotaxis towards multiple  
263 growth factors that are in the serum. Together, these data suggest that CMG2 may act as a  
264 central regulator for chemotaxis that is initiated by bFGF and VEGF. The mechanism of CMG2's  
265 impact on both bFGF and VEGF induced chemotaxis will be important for developing new  
266 efficacious therapies to treat pathological angiogenesis. It remains to be seen whether  
267 interaction of CMG2 with growth factors receptors at the cell surface can be detected.

268

269 **Methods:**

270 Protein preparation

271 Cell culture

272 EA.hy926 (CRL-2922) cells are the result of a fusion of human umbilical vein  
273 cells with lung carcinoma cells. Cells were cultured in 10% FBS + DMEM and incubated  
274 at 37°C in a humidified environment with 5% CO<sub>2</sub> until ready for passaging.

275 EA.hy cell proliferation assay

276 15,000 EA.hy926 cells were seeded into each well in a 96 well plate and incubated for 1  
277 h to attach. After cell attachment, media with treatments were added. Ethanol fixed cells were  
278 used as negative control. After a 24 h incubation, 20 µL CellTiter-Blue Reagent (Promega) was  
279 added to each well for 4 h. Fluorescence signal (Ex: 560nm / Em: 590nm) was measured using  
280 a BioTek Synergy H2 plate reader. All readings were normalized to the non-treated control.

281 Cell ASIC migration assay

282 The assay protocol followed the CellASIC ONIX M04G-02 Microfluidic Gradient Plate  
283 User Guide. All media put into the plate (excepting the cell suspension) was filtered through a  
284 0.2 µm syringe filter. EA.hy cells ( $3 \times 10^6$  cells/mL) were loaded in and incubated overnight with  
285 DMEM + 10% FBS under flow at 37°C. Assays were then performed with a stable gradient of  
286 DMEM + 0 – 10% FBS with or without peptide treatment. Brightfield images at 10x magnification  
287 were taken every 10 min over 12 h on an Olympus IX73 microscope and the ORCA-Flash4.0  
288 camera (Hamamatsu). Individual cells were tracked with Image J manual tracking plugin. Data  
289 was transferred into the ibidi Chemotaxis and Migration Tools 2.0. to export endpoint y  
290 displacement and accumulated displacement. P-values were calculated using Student's *t*-test  
291 and error bars are standard error of the mean (n=50).

## 292 CMG2 ECM ELISA

293 All steps were performed at room temperature unless otherwise indicated. For binding  
294 assays, matrix protein (Rockland Immunochemicals, Corning, EMD Millipore) was adsorbed  
295 onto 96-well polyethylene plates (Greiner) by incubating 2 ug/mL matrix protein in HBS with 2  
296 mM Mg<sup>2+</sup> and Ca<sup>2+</sup> (Buffer A) in individual wells at 4° C overnight. Bacillus anthracis protective  
297 antigen (PA) was treated similarly but was incubated at 1 μM in the same buffer. After  
298 incubation, wells were washed 3x with Buffer A and blocked with 5% BSA (GoldBio) in HBS with  
299 2 mM Mg<sup>2+</sup>, 2 mM Ca<sup>2+</sup>, and 0.1% Tween-20 (Buffer B) for 1 hour. Blocking was followed by 3  
300 washes with Buffer B, after which varying concentrations of a biotinylated CMG2-AviTag  
301 construct (for matrix, 2138 to 10 μM; for PA, 4 μM to 1 pM) were dissolved in Buffer B and  
302 incubated in wells for 4 hours. After incubation with CMG2-AviTag, wells were again washed 3  
303 times, after which streptavidin-HRP (Thermo Scientific) diluted in Buffer B with 5% BSA was  
304 incubated in wells for 1 hour. Wells were then washed 6 times with Buffer B, after which 1x TMB  
305 solution (Thermo Scientific) was added to wells. Once color was visible in wells, reaction was  
306 quenched with 0.2 M H<sub>2</sub>SO<sub>4</sub>. Wells were read out in a BioTek H4 Hybrid plate reader (BioTek)  
307 by quantifying well absorbance at 450 nm. Data were analyzed in Microsoft Excel, and Kd  
308 values were calculated in MATLAB using the `sigm_fit` function.

## 309 Adhesion assay

310 EA.hy 926 cells were grown in DMEM supplemented with 10% FBS. 20μg/mL collagen I,  
311 IV, VI, laminin, fibronectin, PA<sup>SSSR</sup>, and BSA were prepared in PBS and coated in 96well plate  
312 (100□g/well) overnight at 4°C. After coating, collagen I, IV, VI, laminin, fibronectin, PA<sup>SSSR</sup>, and  
313 BSA were removed and 5% BSA were coated for 1 hour. Cells were deprived with serum by  
314 scraped and cells were at 100g for 10 minutes and the supernatant was discarded. Cells then  
315 resuspended at 2-3x10<sup>5</sup> cells/mL in DMEM. 100μL of cells were added to each of the coated  
316 wells. The plate was incubated at 37°C for 1 hour to allow the cells to adhere on the surface.

317 Each well was washed gently for two times using warm serum-free DMEM by multi-channel  
318 pipettor. 100 $\mu$ L of serum free DMEM and 20 $\mu$ L of cell-titler blue (Promega Cat#G8080) were  
319 added into each well, and incubated for 4 hours at 37°C. After 4 hours incubation, fluorescent  
320 signal of 96 well plate was measured at 560<sub>Ex</sub>/590<sub>Em</sub> by a plate reader.

321 EAhy 926 CMG2 KO development:

322 HEK 293T cells ( $3.8 \times 10^6$  cells) were seeded in 10cm tissue culture dish for 18 hours.  
323 12 $\mu$ g of pCMV, 5 $\mu$ g of pVSVG, 12.5 $\mu$ g of Lenti-CRISPR (targeting CMG2 exon 1, sgRNA  
324 sequence: GCACCAACAGCCACAGCCCG), 90 $\mu$ L of 1mg/mL PEI and 600 $\mu$ L of serum-free  
325 DMEM were mixed into a tube and incubated for 15 minutes before adding to the 10cm culture  
326 dish. The dish was replaced with 10mL of 10% FBS DMEM in 4 hours and followed by 48 hours  
327 incubation. Media was removed from the transfected cells into a conical tube, and was spin at  
328 2500g for 3 minutes to remove debris. The supernatant (lentivirus) and 10 $\mu$ g/mL polybrene were  
329 added to 40% confluent EA.hy926 cells and incubated for 24 hours. The next day, media was  
330 removed, fresh 10% FBS DMEM and 1 $\mu$ g/mL puromycin were added to the plate for 3-5 days.  
331 After 3-5 days, the cells that survived in the selection were diluted into single colony in 96 well  
332 plate.

333 PA uptake flow cytometry:

334 CMG2 KO EA.hy 926 cells and WT EA.hy926 cells were split in 12 well plate at 50%  
335 confluent. 200pM PA-Alexa Fluor 546 was added into each well and incubated overnight. Then  
336 cells were trypsinized and resuspended into a microcentrifuge tube. Cells were washed once  
337 with complete media. Then 50,000 cells of each condition were sent to Cytoflex (RIC facility at  
338 BYU). Data was collected and analyzed in our lab by using FlowJo software.

339 Corneal micropocket assay

340 The corneal micropocket assay was performed as described<sup>16</sup> using pellets containing 80 ng  
341 of basic fibroblast growth factor (bFGF) or 180 ng of human carrier-free recombinant vascular  
342 endothelial growth factor (VEGF; R&D Systems) in C57BL/6J mice. The treated groups received  
343 daily or twice daily i.p injections for 5 (bFGF) or 6 (VEGF) consecutive days of protein in PBS.  
344 Treatment was started on the day of pellet implantation; control mice received only vehicle i.p. The  
345 area of vascular response was assessed on the 5th (bFGF) or 6th (VEGF) postoperative day using a  
346 slit lamp. Typically, at least 10 eyes per group were measured.

#### 347 HMVEC proliferation assay

348 Human microvascular endothelial cells (Cambrex) were maintained in EGM-2 (Cambrex)  
349 according to the vendor's instructions and used before passage 7. On day 0, proliferating cultures of  
350 BCE or HMVEC-d cells were seeded at ~10% confluence into 96-well plates. After attachment,  
351 medium was exchanged for medium containing 1 pmol/L to 1  $\mu$ mol/L of the indicated protein. Cells  
352 were allowed to grow for 7 days and then quantified using CyQUANT (Invitrogen) according to  
353 manufacturer's directions. The degree of proliferation in culture was measured by comparing wells in  
354 each plate fixed in absolute ethanol on day 0 with experimental wells, with fold proliferation  
355 calculated by dividing CyQUANT fluorescence in experimental wells by that in day 0 wells. Groups  
356 were compared using Student's *t* test, with Bonferroni correction where appropriate.

#### 357 HMVEC Trans-well migration assay

358 Human microvascular endothelial cells were maintained as above. Polycarbonate Transwell  
359 inserts, 6.5 mm diameter with 8.0  $\mu$ m pores, were coated with fibronectin (BD Biosciences). Cells  
360 were harvested and resuspended in EBM (Cambrex) containing 0.1% bovine serum albumin (Fisher  
361 Chemical). Cells (10,000 per well) were plated onto wells containing medium alone or medium  
362 containing the molecule to be tested. These wells were suspended above wells containing 5 to 10  
363 ng/mL recombinant human VEGF (R&D Systems) or full serum medium. Cells were allowed to  
364 migrate for 4 h. Membranes were rinsed once in PBS and then fixed and processed using Diff-Quick



365 (Dade Diagnostics). Cells on the top of the membrane were removed using cotton-tipped  
366 applicators, and the membrane was removed from the insert using a scalpel. Membranes were then  
367 mounted on slides, and the number of cells in a microscopic field was counted manually.

#### 368 HMVEC CMG2 / TEM8 KD

369 CMG2 and/or TEM8 knockdown in HMVEC was achieved using Dharmacon smartpools  
370 (Dharmacon, Lafayette, CO) and RNAimax (ThermoFisher, Waltham, MA) in OPTI-MEM with  
371 Glutamax (ThermoFisher, Waltham, MA). Approximately 6 hours after addition of the  
372 transfection complex, an equal volume of EBM-2 was added to the cells, and media was  
373 changed to EBM-2 ~18 hours later.

#### 374 HMVEC tube formation assay

375 Human microvascular endothelial cells were maintained as above. Before the assay, a 1- to  
376 2-mm layer of Matrigel was plated into the wells of a 12-well cluster. Approximately  $10^5$  cells were  
377 plated on this layer in EGM-2. Plates were examined at 12, 14, 16, 18, and 24 h for differences in  
378 network formation. In each experiment, good network formation was observed in untreated control  
379 wells.

#### 380 CMG2 and TEM8 KO mice

381 CMG2 and TEM8 knockout mice were a kind gift from Stephen Leppla. They were housed in  
382 the ARCH facility at Boston Children's Hospital on standard food and bedding (CMG2) or on  
383 standard food and bedding, with supplemental soft food available (Nutra-gel mouse diet, Bio-  
384 Serv, Flemington, NJ). Genotyping was performed by Transnetyx (Cordova, TN).

#### 385 Western Blotting

386 Near-confluent HMVEC WT and CMG2 / TEM8 KD cells were washed three times in cold PBS, and  
387 lysed for 30min at 4°C in PBS supplemented with 1% Triton X-100 and a protease inhibitor cocktail  
388 (cOmplete mini protease inhibitor cocktail, Roche). Lysates were cleared by centrifugation at 16,000

389    xg and the supernatant protein concentration was measured by BCA assay. Protein (40 $\mu$ g) from  
390    each sample was used for SDS-PAGE and blotted onto PVDF. Following blocking, the membranes  
391    were probed with antibodies against CMG2 (1:1000 16723-1-AP, Proteintech, Rosemont, IL) or  
392    TEM8 (1:1000 ab21269, Abcam, Cambridge, UK), then stripped and reprobed for beta-actin  
393    (1:10,000 A5441, Sigma) as loading control. Blots were imaged using a ChemiDoc imager (Bio-  
394    Rad, Hercules, CA).

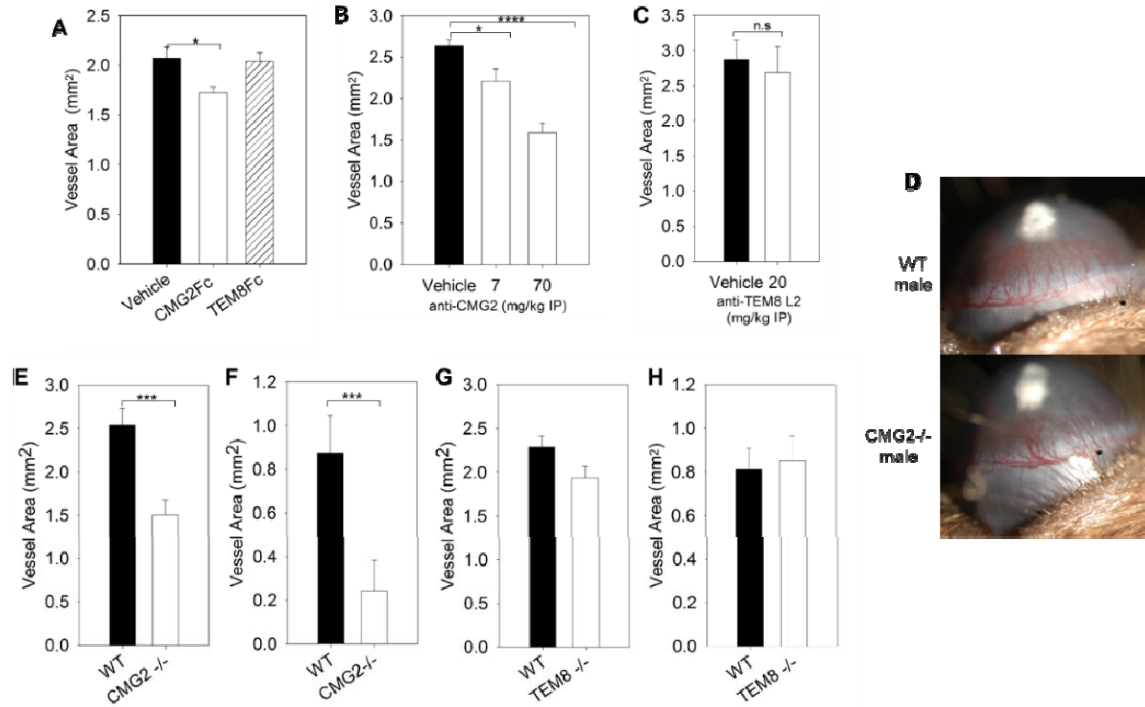

395

396

397 **Figure 1. Blocking the interactions of CMG2 with its natural ligand inhibits both FGF and**  
398 **VEGF induced corneal neovascularization *in vivo*.** (A) Corneal micropocket assay on mice  
399 treated with soluble ECD of either CMG2 or TEM8, via intraperitoneal injection. (B-C) Corneal  
400 micro-pocket assay on mice treated with either anti-CMG2 antibody (B) or anti-TEM8 L2 anti-  
401 body (C). Corneal neovascularization in these assays was induced by bFGF before treatment;  
402 vessel area on both the left and right corneas were measured from each mouse. (D)  
403 Representative image of corneal neovascularization in both wild type (WT) and CMG2<sup>-/-</sup> male  
404 mice. (E-F) Comparison of corneal neovascularization between WT and CMG2<sup>-/-</sup> mice induced  
405 by either bFGF (E) or VEGF (F). CMG2<sup>-/-</sup> mice showed significant reductions in  
406 neovascularization for both bFGF- and VEGF-induced angiogenesis. (G-H) A similar experiment  
407 was performed with WT and TEM8<sup>-/-</sup> mice with either bFGF (G) or VEGF (H). Data presented  
408 are pooled from both genders. Error bars are standard error of mean, \* p<0.05; \*\* p<0.01; \*\*\*  
409 p<0.001.

410

411

412

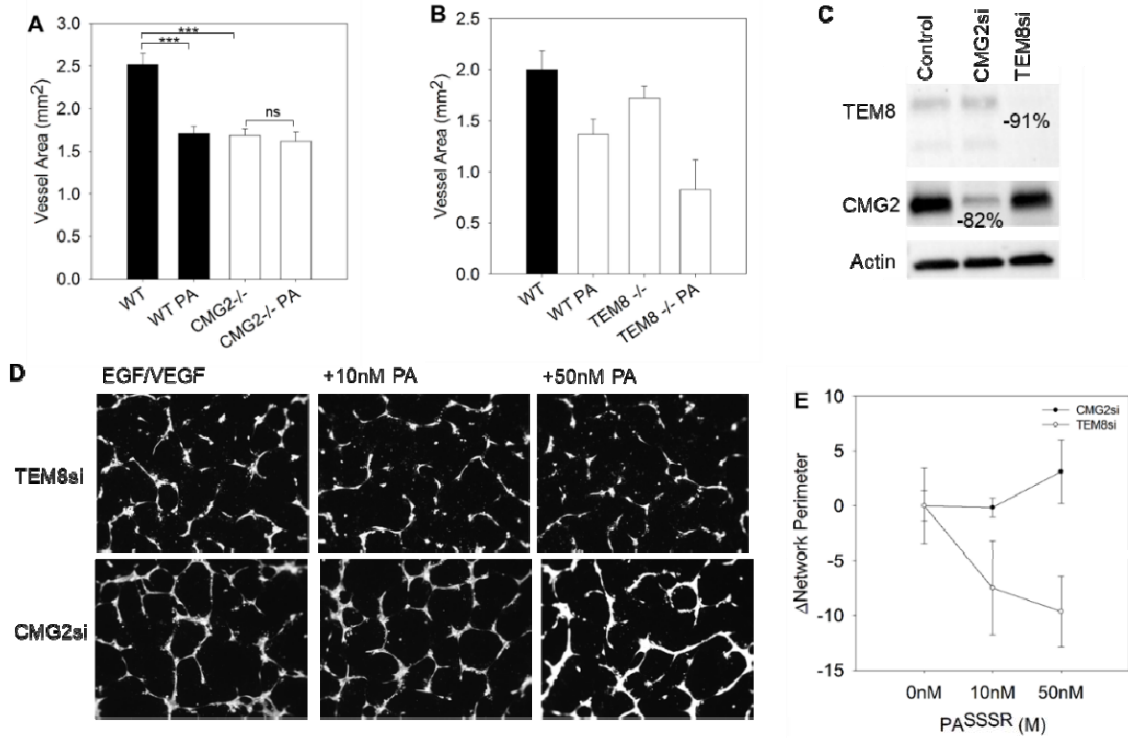

413

414

415 **Figure 2. CMG2 is the main mediating receptor of PA<sup>SSSR</sup>-induced angiogenic inhibition.**  
 416 (A) Comparative levels of bFGF-induced corneal neovascularization between CMG2<sup>-/-</sup> and WT  
 417 mice treated with or without PA<sup>SSSR</sup>, and (B) TEM8<sup>-/-</sup> and WT mice treated with or without  
 418 PA<sup>SSSR</sup>. Results showed that PA<sup>SSSR</sup> reduced vessel formation on TEM8<sup>-/-</sup> mice but not CMG2<sup>-/-</sup>  
 419 mice. Error bars are standard error of mean. (C) Western blot of HMVEC lysates with either  
 420 CMG2 knockdown (CMG2si) or TEM8 knockdown (TEM8si). Band intensity was normalized to  
 421 control (untreated cells). (D) EGF- and VEGF-induced tubule formation assays with both  
 422 CMG2si- and TEM8si-HMVEC, treated with or without different concentrations of PA<sup>SSSR</sup>. (E)  
 423 Quantification of tube formation assays by counting the number of networks on each field. Error  
 424 bars are standard deviation.

425

426

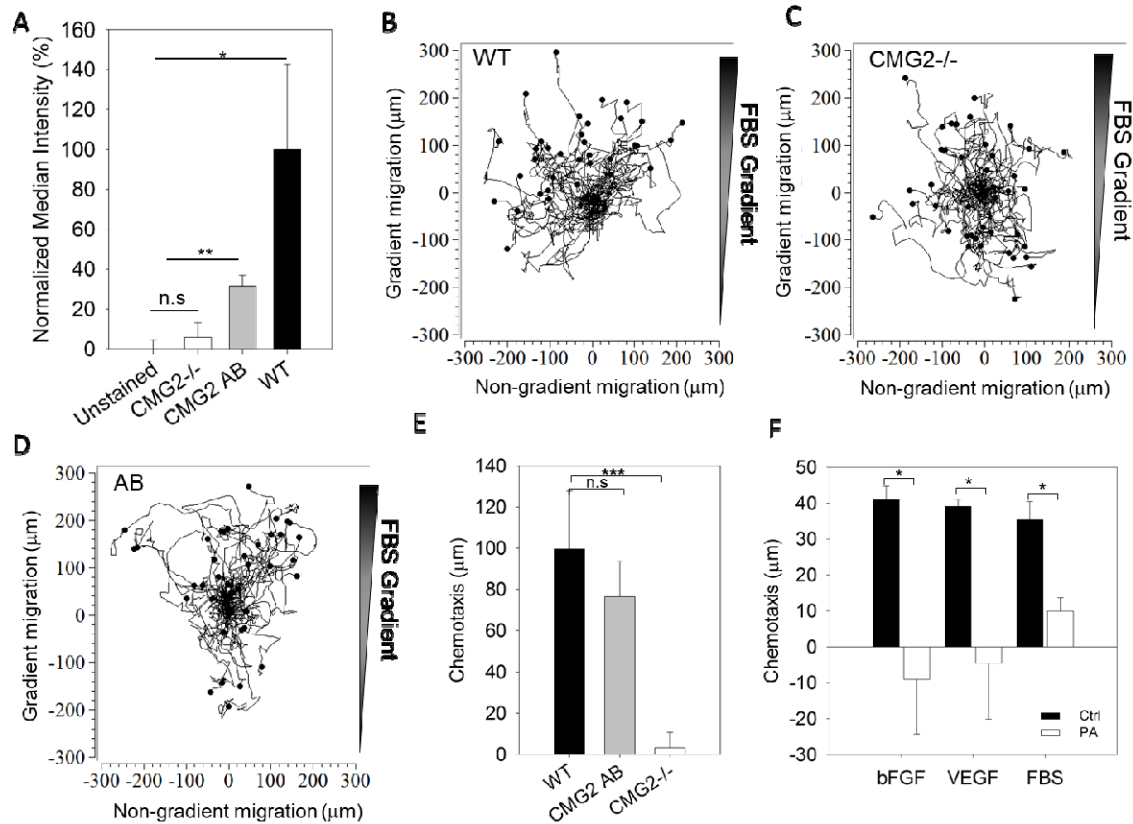

427

428 **Figure 3. CMG2 KO EA.hy926 endothelial cells lose the ability to migrate toward**  
 429 **chemoattractants**. (A) Differential PA-AF586 conjugate uptake by wild type (WT), CMG2 add  
 430 back (AB) CMG2 knockout (CMG2<sup>-/-</sup>) EA.hy926 cells via flow cytometry (10,000 cells per  
 431 condition). Median fluorescence intensity of each condition was normalized against WT signal  
 432 after subtracting from the unstain control. Error bars are normalized standard deviation from  
 433 three individual replicates. (B) Aggregated track plots of individual EA.hy926 cell migration in the  
 434 CellASIC migration chamber. Both WT cells (B), CMG2<sup>-/-</sup> cells (C), and CMG2 AB cells were  
 435 subjected to an FBS gradient. (E) Quantification of EA.hy926 chemotaxis (displacement toward  
 436 gradient, E) in the CellASIC migration assay. (F) Quantification of EA.hy926 WT cells  
 437 chemotaxis in bFGF, VEGF and FBS with or without the presence of 200pM PA<sup>SSSR</sup>. \* p<0.05;  
 438 \*\* p<0.01; \*\*\* p<0.001; n.s not significant

439

440

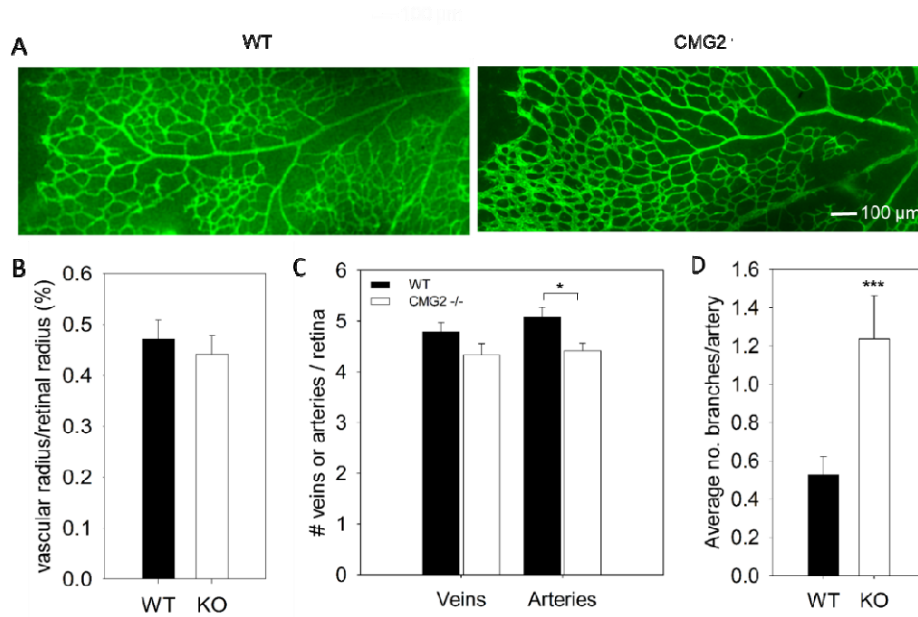

441

442 **Figure 4. CMG2 KO increases vessel branching in the mouse retina.** (A) Representative  
443 images of vessel formation in the retina of both WT (left) and CMG2<sup>-/-</sup> (right) mice. (B-D)  
444 Quantified vessel formation from retinal assays. (B) Comparison of vascular radius, normalized  
445 to the retinal radius, between WT and CMG2<sup>-/-</sup> mice. (C) Quantification of arterial branching in  
446 both WT and CMG2<sup>-/-</sup> mouse retinas. (D) Artery and vein counts per retina as in WT and  
447 CMG2<sup>-/-</sup> mice. CMG2<sup>-/-</sup> mouse retinas exhibit fewer veins and arteries than WT, but only artery  
448 count is significantly lower than WT mice.

449

450

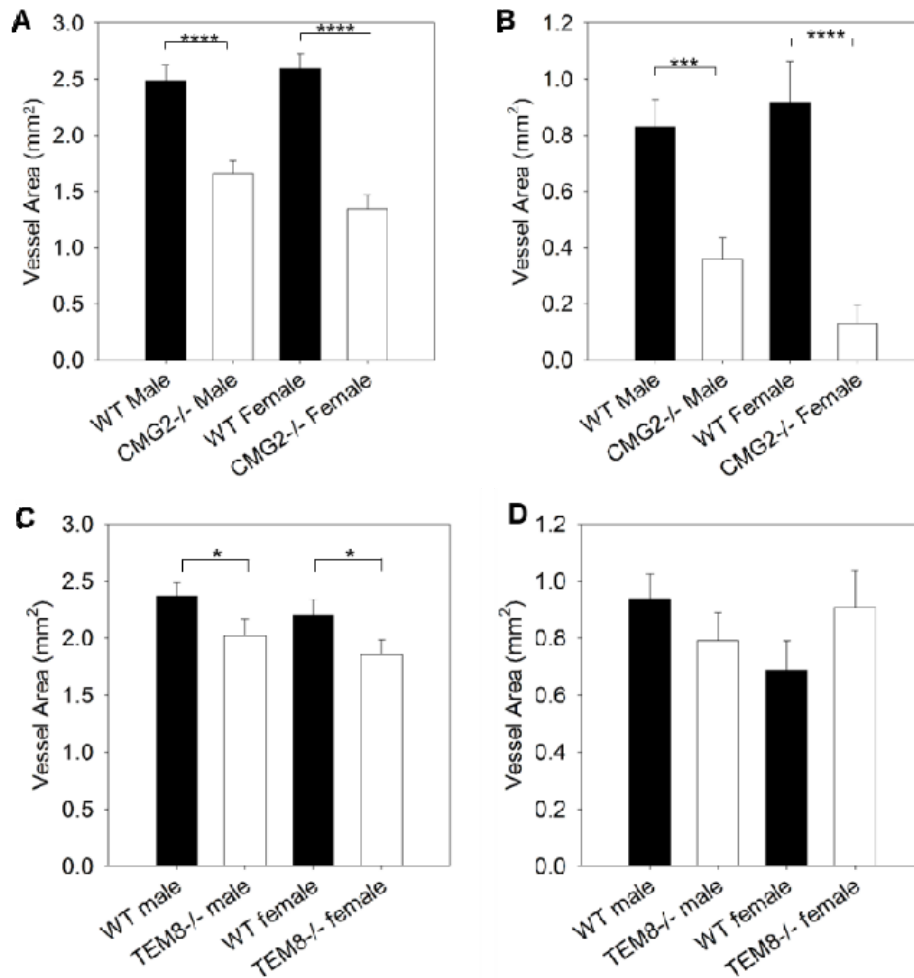

451 Supplementary Figure 1

452 **Supplementary Figure S1. Gender-specific quantification of bFGF- and VEGF-induced**  
453 **corneal vascularization in WT, CMG2 KO, and TEM8 KO mice.** (A-B) Quantification of (A)  
454 bFGF-induced and (B) VEGF-induced neovascularization in male and female CMG2<sup>-/-</sup> mice as  
455 compared to WT. (C-D) Quantification of (C) bFGF-induced and (D) VEGF-induced  
456 neovascularization in male and female TEM8<sup>-/-</sup> mice as compared to WT. For both genders,  
457 greater decreases in corneal vascularization were observed in CMG2 KO than for TEM8 KO.

458

459

460 Supplementary Figure 2

Fig S4

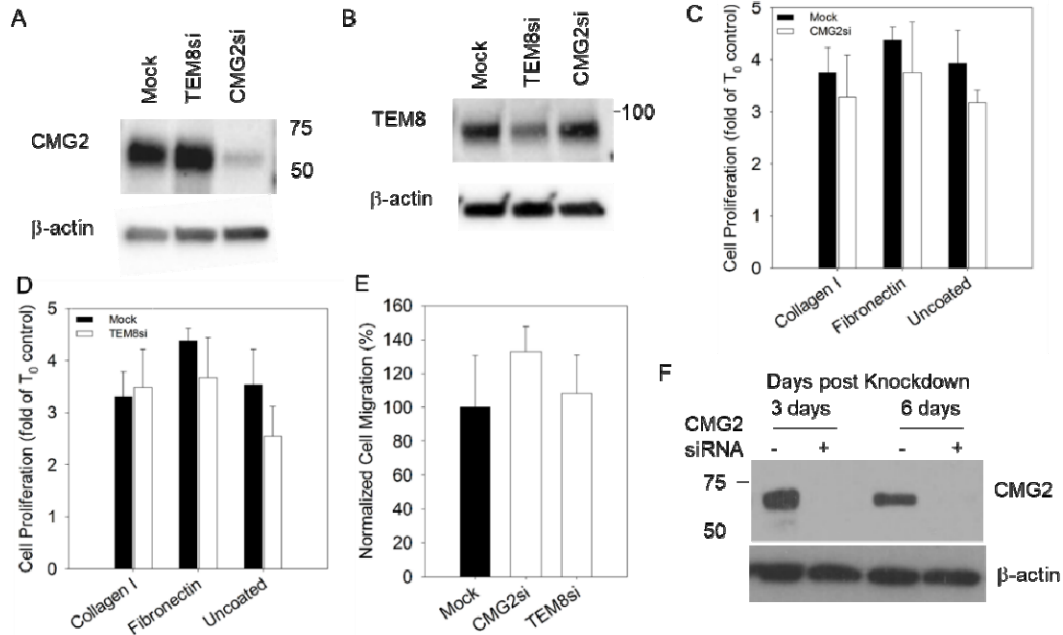

461

462

463 **Supplementary Figure S2. Effects of CMG2 and TEM8 siRNA-mediated knockdown on**  
464 **HMVECs cell proliferation and migration.** (A-B) Western blot analysis of HMVECs lysates for  
465 (A) CMG2 and (B) TEM8 before and after introduction of siRNA. (C-D) Proliferation of both WT  
466 and siRNA-treated Ea.hy926 cells with both (C) CMG2-specific and (D) TEM8-specific siRNA.  
467 Proliferation was not significantly altered from WT in either CMG2-targeted or TEM8-targeted  
468 cells. (E) Migration of WT, CMG2 siRNA and TEM8 siRNA-treated HMVECs cells. No significant  
469 difference in migration was observed from WT. (F) Western blot analysis of HMVECs lysates for  
470 CMG2 expression 3 days and 6 days after addition of siRNA.

471



472 Table S1

| Protein                  | kD (nM) | Std. Dev | Repeats |
|--------------------------|---------|----------|---------|
| Collagen I               | 500     | 141      | 3       |
| Collagen VI              | 800     | 411      | 3       |
| Laminin-111              | 500     | 158      | 2       |
| Fibronectin              | 500     | 141      | 3       |
| PA (positive control)    | 0.46    | 0.047    | 3       |
| PA w/EDTA (neg. control) | None    | N/A      | 2       |

473

474 **Supplementary Table S1. CMG2 binds several broadly expressed matrix proteins with**  
475 **high affinity.** Results of an ELISA-based quantification of CMG2 binding to several broadly-  
476 expressed matrix proteins, including collagens, laminin-111, and fibronectin. For positive  
477 control, PA was assayed for binding to CMG2. Such similar affinities between matrix proteins  
478 indicate that CMG2 shows no preference for binding to any one of the matrix proteins assayed.

479

480 Supplementary Figure S3

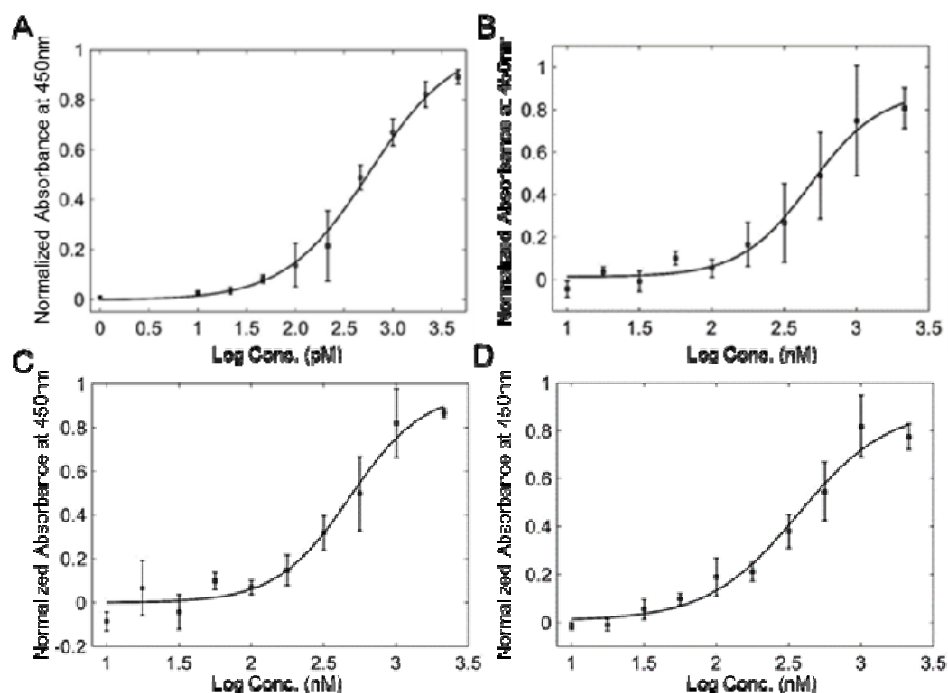

481

482 **Supplementary Figure S3.** Binding of CMG2 to extracellular matrix proteins, as determined by  
483 ELISA. Proteins were coated on wells, after which CMG2-GST-biotin was added and signal  
484 read out with streptavidin-HRP/TMB. KD values were calculated by fitting each dataset to a 4-  
485 parameter logistic curve. A, positive control (PA); B, fibronectin; C, collagen I; D, collagen VI. PA  
486 x axis scale is logarithmic with pM concentration units; all others are logarithmic with nM  
487 concentration values. Y axis is normalized absorbance at 450 nm. Collagen IV and laminin-111  
488 were also assayed for binding, but curves are not displayed due to poor fit. In each case, similar  
489 binding affinities (500 nM-1  $\mu$ M) were observed (see Supplementary Table S1).

490 Supplementary Figure 4

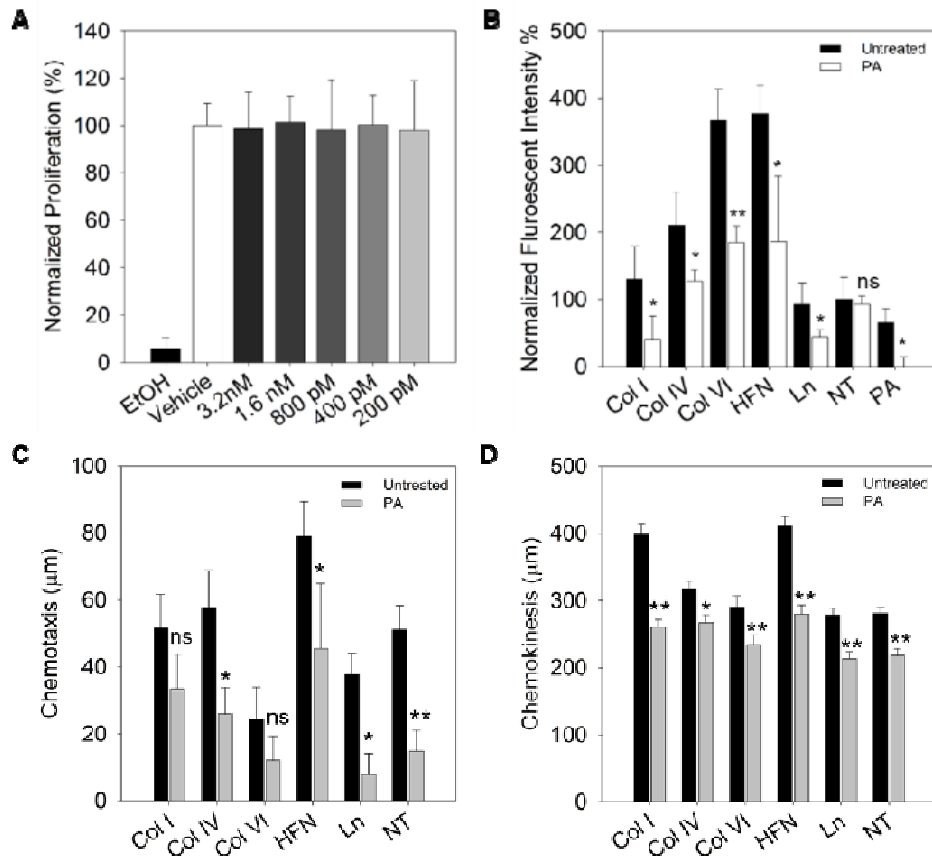

491

492 **Supplementary Figure S4. Matrix binding to CMG2 is an important component of**  
 493 **endothelial cell adhesion and migration.** (A) EA.hy926 endothelial cell proliferation in  
 494 different concentrations of PA<sup>SSSR</sup>. Ethanol (EtOH) treated cells was used as the negative  
 495 control. (B) EA.hy926 endothelial cell adhesion to plates coated with various matrix proteins, or  
 496 no ECM proteins (“NT”), both with and without 200 pM PA. Addition of PA significantly inhibits  
 497 adhesion to matrix-coated plates. Adhesion to uncoated plates was not affected by PA<sup>SSSR</sup>  
 498 treatment. (C-D) EA.hy926 migration on different ECM coated surface and compare to the  
 499 PA<sup>SSSR</sup> treatment. Chemotaxis are the vertical displacement measured towards a serum  
 500 gradient form across the migration chamber (C). While chemokinesis are measured by total  
 501 distance cell migrated in random direction (D). statistic significance between untreated and PA  
 502 treated cell was calculated by student T.Test. Error bars are standard deviation of mean, \*  
 503 p<0.05; \*\* p<0.01; n.s not significant

504

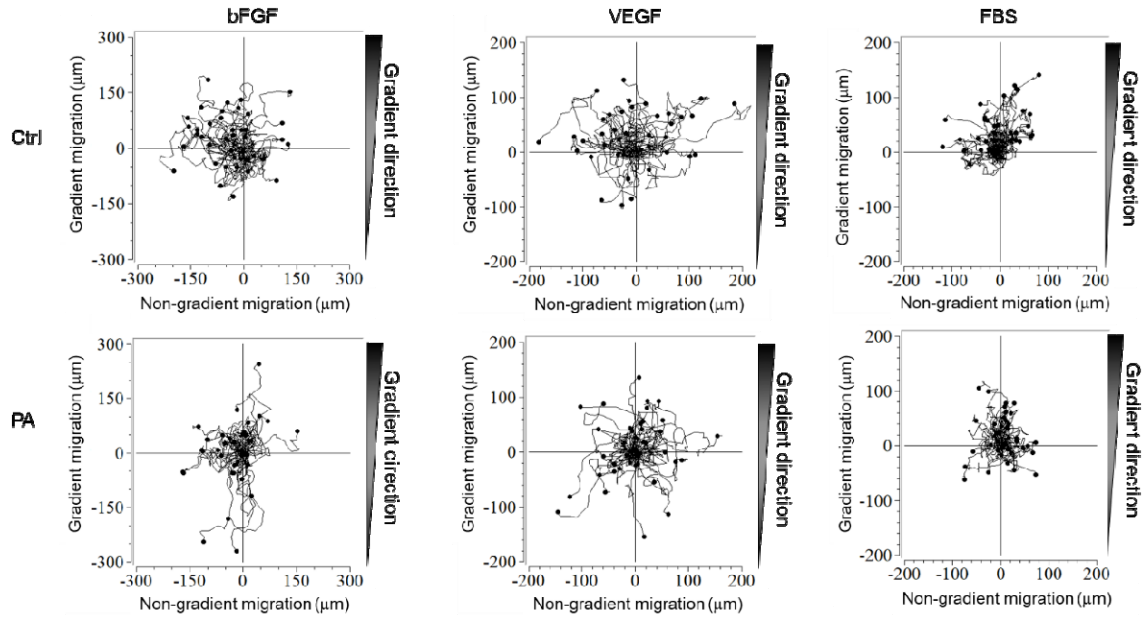

505

506 **Supplementary Figure S5. Migration track plots of CMG2 directs cell chemotaxis towards**  
507 **bFGF, VEGF, and serum.** EA.hy926 WT cells were placed in a gradient of bFGF (left), VEGF  
508 (middle) and FBS (right), with or without the presence of 200pM PA<sup>SSSR</sup> (top and bottom  
509 respectively). Each migration condition were performed 37°C for 8 hours. Cell tracking was done  
510 in ImageJ with forty cells were tracked in each condition. Raw data were then imported into  
511 chemotaxis and migration tool from ibidi to make track plots.

512

513 **References:**

- 514 [1] Rogers, M. S., Christensen, K. A., Birsner, A. E., Short, S. M., Wigelsworth, D. J., Collier, R. J., and  
515 D'Amato, R. J. (2007) Mutant anthrax toxin B moiety (protective antigen) inhibits angiogenesis  
516 and tumor growth, *Cancer Res* 67, 9980-9985.
- 517 [2] Bell, S. E., Mavila, A., Salazar, R., Bayless, K. J., Kanagala, S., Maxwell, S. A., and Davis, G. E. (2001)  
518 Differential gene expression during capillary morphogenesis in 3D collagen matrices: regulated  
519 expression of genes involved in basement membrane matrix assembly, cell cycle progression,  
520 cellular differentiation and G-protein signaling, *J Cell Sci* 114, 2755-2773.
- 521 [3] Cryan, L. M., Bazinet, L., Habeshian, K. A., Cao, S., Clardy, J., Christensen, K. A., and Rogers, M. S.  
522 (2013) 1,2,3,4,6-Penta-O-galloyl-beta-D-glucopyranose inhibits angiogenesis via inhibition of  
523 capillary morphogenesis gene 2, *J Med Chem* 56, 1940-1945.
- 524 [4] E, G. D., Carrero, P., Madrona, A., Rodriguez-Salamanca, P., Martinez-Gualda, B., Camarasa, M. J.,  
525 Jimeno, M. L., Bennallack, P. R., Finnell, J. G., Tsang, T. M., Christensen, K. A., San-Felix, A., and  
526 Rogers, M. S. (2019) Galloyl Carbohydrates with Antiangiogenic Activity Mediated by Capillary  
527 Morphogenesis Gene 2 (CMG2) Protein Binding, *J Med Chem* 62, 3958-3970.
- 528 [5] Scobie, H. M., Rainey, G. J. A., Bradley, K. A., and Young, J. A. T. (2003) Human capillary  
529 morphogenesis protein 2 functions as an anthrax toxin receptor, *P Natl Acad Sci USA* 100, 5170-  
530 5174.
- 531 [6] Lacy, D. B., Wigelsworth, D. J., Scobie, H. M., Young, J. A., and Collier, R. J. (2004) Crystal structure of  
532 the von Willebrand factor A domain of human capillary morphogenesis protein 2: an anthrax  
533 toxin receptor, *Proc Natl Acad Sci U S A* 101, 6367-6372.
- 534 [7] van der Goot, G., and Young, J. A. (2009) Receptors of anthrax toxin and cell entry, *Mol Aspects Med*  
535 30, 406-412.
- 536 [8] Burgi, J., Kunz, B., Abrami, L., Deuquet, J., Piersigilli, A., Scholl-Burgi, S., Lausch, E., Unger, S., Superti-  
537 Furga, A., Bonaldo, P., and van der Goot, F. G. (2017) CMG2/ANTXR2 regulates extracellular  
538 collagen VI which accumulates in hyaline fibromatosis syndrome, *Nat Commun* 8, 15861.
- 539 [9] Bayram, Y., Pehlivan, D., Karaca, E., Gambin, T., Jhangiani, S. N., Erdin, S., Gonzaga-Jauregui, C.,  
540 Wiszniewski, W., Muzny, D., Elcioglu, N. H., Yildirim, M. S., Bozkurt, B., Zamani, A. G.,  
541 Boerwinkle, E., Gibbs, R. A., Lupski, J. R., and Geno, B. H. C. M. (2014) Whole Exome Sequencing  
542 Identifies Three Novel Mutations in ANTXR1 in Families with GAPO Syndrome, *American Journal*  
543 *of Medical Genetics Part A* 164, 2328-2334.
- 544 [10] Stranecky, V., Hoischen, A., Hartmannova, H., Zaki, M. S., Chaudhary, A., Zudaire, E., Noskova, L.,  
545 Baresova, V., Pristoupilova, A., Hodanova, K., Sovova, J., Hulkova, H., Piherova, L., Hehir-Kwa, J.  
546 Y., de Silva, D., Senanayake, M. P., Farrag, S., Zeman, J., Martasek, P., Baxova, A., Afifi, H. H., St  
547 Croix, B., Brunner, H. G., Temtamy, S., and Knoch, S. (2013) Mutations in ANTXR1 cause GAPO  
548 syndrome, *Am J Hum Genet* 92, 792-799.
- 549 [11] Landing, B. H., and Nadorra, R. (1986) Infantile systemic hyalinosis: report of four cases of a disease,  
550 fatal in infancy, apparently different from juvenile systemic hyalinosis, *Pediatr Pathol* 6, 55-79.
- 551 [12] Tanaka, K., Ebihara, T., Kusubata, M., Adachi, E., Arai, M., Kawaguchi, N., Utsunomiya, J., Miki, Y.,  
552 Hiramoto, M., Hattori, S., and Irie, S. (2009) Abnormal collagen deposition in fibromas from  
553 patient with juvenile hyaline fibromatosis, *J Dermatol Sci* 55, 197-200.
- 554 [13] Deuquet, J., Lausch, E., Superti-Furga, A., and van der Goot, F. G. (2012) The dark sides of capillary  
555 morphogenesis gene 2, *Embo J* 31, 3-13.
- 556 [14] Glover, M. T., Lake, B. D., and Atherton, D. J. (1991) Infantile systemic hyalinosis: newly recognized  
557 disorder of collagen?, *Pediatrics* 87, 228-234.

- 558 [15] Cryan, L. M., and Rogers, M. S. (2011) Targeting the anthrax receptors, TEM-8 and CMG-2, for anti-  
559 angiogenic therapy, *Front Biosci (Landmark Ed)* 16, 1574-1588.
- 560 [16] Rogers, M. S., Birsner, A. E., and D'Amato, R. J. (2007) The mouse cornea micropocket angiogenesis  
561 assay, *Nat Protoc* 2, 2545-2550.
- 562 [17] Bradley, K. A., Mogridge, J., Mourez, M., Collier, R. J., and Young, J. A. T. (2001) Identification of the  
563 cellular receptor for anthrax toxin, *Nature* 414, 225-229.
- 564 [18] Wigelsworth, D. J., Krantz, B. A., Christensen, K. A., Lacy, D. B., Juris, S. J., and Collier, R. J. (2004)  
565 Binding stoichiometry and kinetics of the interaction of a human anthrax toxin receptor, CMG2,  
566 with protective antigen, *J Biol Chem* 279, 23349-23356.
- 567 [19] Martchenko, M., Jeong, S. Y., and Cohen, S. N. (2010) Heterodimeric integrin complexes containing  
568 beta1-integrin promote internalization and lethality of anthrax toxin, *Proc Natl Acad Sci U S A*  
569 107, 15583-15588.
- 570 [20] Scobie, H. M., Thomas, D., Marlett, J. M., Destito, G., Wigelsworth, D. J., Collier, R. J., Young, J. A.,  
571 and Manchester, M. (2005) A soluble receptor decoy protects rats against anthrax lethal toxin  
572 challenge, *J Infect Dis* 192, 1047-1051.
- 573 [21] Liu, S., Crown, D., Miller-Randolph, S., Moayeri, M., Wang, H., Hu, H., Morley, T., and Leppla, S. H.  
574 (2009) Capillary morphogenesis protein-2 is the major receptor mediating lethality of anthrax  
575 toxin in vivo, *Proc Natl Acad Sci U S A* 106, 12424-12429.
- 576 [22] Scobie, H. M., Wigelsworth, D. J., Marlett, J. M., Thomas, D., Rainey, G. J., Lacy, D. B., Manchester,  
577 M., Collier, R. J., and Young, J. A. (2006) Anthrax toxin receptor 2-dependent lethal toxin killing  
578 in vivo, *PLoS Pathog* 2, e111.
- 579 [23] Chaudhary, A., Hilton, M. B., Seaman, S., Haines, D. C., Stevenson, S., Lemotte, P. K., Tschantz, W. R.,  
580 Zhang, X. M., Saha, S., Fleming, T., and St Croix, B. (2012) TEM8/ANTXR1 Blockade Inhibits  
581 Pathological Angiogenesis and Potentiates Tumoricidal Responses against Multiple Cancer  
582 Types, *Cancer Cell* 21, 212-226.
- 583 [24] Gerhardt, H., Golding, M., Fruttiger, M., Ruhrberg, C., Lundkvist, A., Abramsson, A., Jeltsch, M.,  
584 Mitchell, C., Alitalo, K., Shima, D., and Betsholtz, C. (2003) VEGF guides angiogenic sprouting  
585 utilizing endothelial tip cell filopodia, *J Cell Biol* 161, 1163-1177.
- 586 [25] Lacy, D. B., Wigelsworth, D. J., Scobie, H. M., Young, J. A. T., and Collier, R. J. (2004) Crystal structure  
587 of the von Willebrand factor A domain of human capillary morphogenesis protein 2: An anthrax  
588 toxin receptor, *P Natl Acad Sci USA* 101, 6367-6372.
- 589 [26] Whittaker, C. A., and Hynes, R. O. (2002) Distribution and evolution of von Willebrand/integrin A  
590 domains: widely dispersed domains with roles in cell adhesion and elsewhere, *Mol Biol Cell* 13,  
591 3369-3387.
- 592 [27] Gao, M., and Schulten, K. (2006) Onset of anthrax toxin pore formation, *Biophys J* 90, 3267-3279.
- 593 [28] Hulkower, K. I., and Herber, R. L. (2011) Cell migration and invasion assays as tools for drug  
594 discovery, *Pharmaceutics* 3, 107-124.
- 595 [29] Castanon, I., Abrami, L., Holtzer, L., Heisenberg, C. P., van der Goot, F. G., and Gonzalez-Gaitan, M.  
596 (2013) Anthrax toxin receptor 2a controls mitotic spindle positioning, *Nat Cell Biol* 15, 28-39.

597

598

599

600

601

602

603

604

605    Supplementary note:

606            1. bFGF was more used in corneal assays because we saw a better angiogenic effects

607            2. 200pM PA was targeting CMG2
